# Supplementary material
Source: publisher figshare collection journal article supplement (https://aacr.figshare.com/articles/dataset/_/22472783)
Supplement: Supplementary file 1 [file 39924287]

**Supplementary Table S1.** Dose levels of ASTX660 by cohort

| <b>Cohort #</b> | <b>Dose, mg/d<sup>a</sup></b> | <b>DLT</b> | <b>Evaluable patients, n</b> | <b>Note</b>                                                                                                                                                                             |
|-----------------|-------------------------------|------------|------------------------------|-----------------------------------------------------------------------------------------------------------------------------------------------------------------------------------------|
| 1               | 15 (PiB)                      | N/A        | 3                            |                                                                                                                                                                                         |
| 2               | 30 (PiB)                      | No         | 3                            |                                                                                                                                                                                         |
| 3               | 60 (PiB)                      | No         | 4                            |                                                                                                                                                                                         |
| 4               | 120 (PiB)                     | No         | 3                            |                                                                                                                                                                                         |
| 5               | 180 (PiB)                     | No         | 3                            | Decision to transition to Cap formulation at same dose (180 mg/d)                                                                                                                       |
| 6               | 180 (Cap)                     | No         | 3                            |                                                                                                                                                                                         |
| 7               | 270 (Cap)                     | Yes (n=2)  | 6                            | 2 DLTs (grade 3 increased lipase and grade 3 hyperlipasemia), which prompted decision to de-escalate to 210 mg/d                                                                        |
| 8               | 210 (Cap)                     | Yes (n=1)  | 8                            | 1 DLT (grade 3 increased lipase); DSRC reviewed available safety, PK, and PD data, and reached consensus to expand 180-mg/d Cap dose level up to 12 patients in part 2 (dose expansion) |
| Part 2          | 180 (Cap)                     | No         | —                            | DSRC reviewed available data from dose escalation and expansion, and determined 210 mg/d the MTD and 180 mg/d the RP2D                                                                  |

<sup>a</sup>Dosing schedule for all cohorts occurred as follows: 7 days on/7 days off x 2 (28-day cycle). Cap, capsule; DSRC, data and safety review committee.
